# Supplementary material
Source: Springer Nature journal article supplement (https://www.springermedizin.de/resource/supplementary/12916_2011_519_MOESM1_ESM.pdf/9597900)

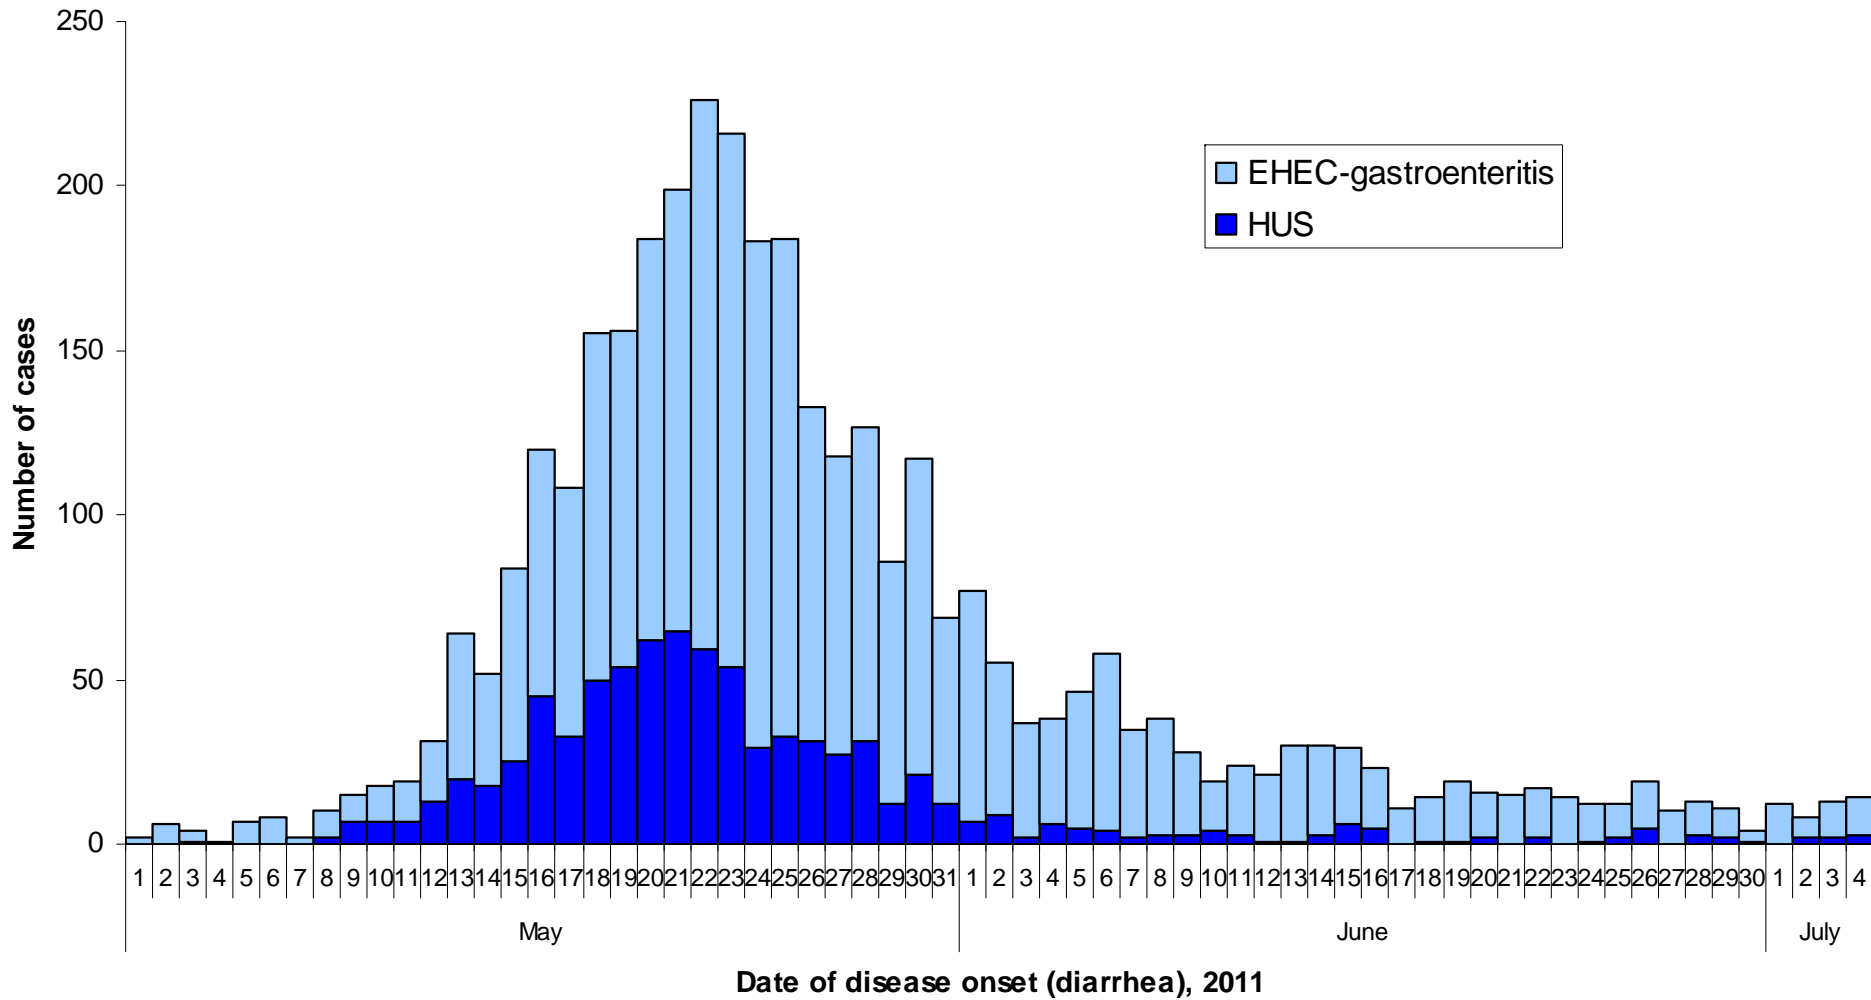

Supplement: MOESM1 [file 9597900]
